# Supplementary material
Source: ML conference proceedings conference paper supplement (https://openaccess.thecvf.com/content/WACV2023/html/Zhang_Beyond_RGB_Scene-Property_WACV_2023_paper.html)
Supplement: Supplementary file 1 [file Zhang_Beyond_RGB_Scene-Property_WACV_2023_supplemental.zip]

# Beyond RGB: Scene-Property Synthesis with Neural Radiance Fields

## Supplementary Material

Mingtong Zhang<sup>\*,1</sup> Shuhong Zheng<sup>\*,1</sup> Zhipeng Bao<sup>2</sup> Martial Hebert<sup>2</sup> Yu-Xiong Wang<sup>1</sup>

<sup>1</sup>University of Illinois Urbana-Champaign

<sup>2</sup>Carnegie Mellon University

{mz62, szheng36, yxw}@illinois.edu

{zbao, hebert}@cs.cmu.edu

In this supplementary material, we first provide a demo video and the corresponding implementation detail in Section 1. In Section 2, we include additional experimental evaluation, including the full comparison with the heuristic and hybrid models, the comparison between the two different modeling strategies for all the properties, full ablation results on the color branch, and more visualizations on both the BlendedMVS and Replica datasets. We conduct more comprehensive investigation on multi-task learning and transfer learning with multiple scene properties within our SS-NeRF framework in Section 3. Finally, in Section 4, we provide additional implementation details of the model architecture, dataset processing, and training procedure.

## 1. Demo Video

We include a demo video in the supplementary zip file to show that our SS-NeRF model is capable of generalizing to arbitrary poses within the scene scope. We pick 9 adjacent views in scene Room\_0 of the Replica dataset as anchor views and perform a linear interpolation between each pair of adjacent anchor views. For each pair of anchor views, we interpolate 24 new views, thus making a total of  $24 \times 8 + 9 = 201$  views. We render the RGB, semantic segmentation, shading, surface normal, keypoint, and edge maps using our SS-NeRF model for each of the 201 views and yield the video at a frame rate of 20 FPS.

## 2. Additional Experimental Evaluation

### 2.1. Full Results of Heuristic and Hybrid Models

In the main paper, we provided the averaged results for the Heuristic and Hybrid baselines on the Replica dataset [7]. The full results of these two models are shown in Table 1 (Heuristic) and Table 2 (Hybrid). Combining with the results presented in Table 1 of the main paper, we can find that SS-NeRF outperforms both baselines in all the tasks and for all the scenes. These results further validate the effective model design of SS-NeRF, and also indicate that the shared

| Scene            | SL ( $\uparrow$ ) | SN ( $\downarrow$ ) | SH ( $\downarrow$ ) | KP ( $\downarrow$ ) | ED ( $\downarrow$ ) |
|------------------|-------------------|---------------------|---------------------|---------------------|---------------------|
| Office_3         | 0.8849            | 0.0328              | 0.0379              | 0.0055              | 0.0393              |
| Office_4         | 0.8824            | 0.0394              | 0.0639              | 0.0060              | 0.0457              |
| Room_0           | 0.7924            | 0.0431              | 0.0419              | 0.0068              | 0.0635              |
| Room_1           | 0.8721            | 0.0541              | 0.0365              | 0.0052              | 0.0343              |
| Avg. (Heuristic) | 0.8580            | 0.0424              | 0.0451              | 0.0059              | 0.0457              |
| Avg. (SS-NeRF)   | <b>0.9243</b>     | <b>0.0395</b>       | <b>0.0429</b>       | <b>0.0038</b>       | <b>0.0179</b>       |

Table 1: Performance of the Heuristic model on the Replica dataset. SL: Semantic Labels; SN: Surface Normal; SH: Shading; KP: Keypoint; ED: Edge. Following the standard practice, for the measurement of SL, we use mIoU as the evaluation metric; for the rest of the tasks, we adopt  $\mathcal{L}_1$  error as the evaluation metric. SS-NeRF outperforms the heuristic baseline for all the scenes and all the tasks, indicating the effectiveness of our SS-NeRF model design.

| Scene          | SL ( $\uparrow$ ) | SN ( $\downarrow$ ) | SH ( $\downarrow$ ) | KP ( $\downarrow$ ) | ED ( $\downarrow$ ) |
|----------------|-------------------|---------------------|---------------------|---------------------|---------------------|
| Office_3       | 0.7735            | 0.0427              | 0.0612              | 0.0048              | 0.0310              |
| Office_4       | 0.8546            | 0.0408              | 0.0732              | 0.0052              | 0.0307              |
| Room_0         | 0.6086            | 0.0766              | 0.0721              | 0.0064              | 0.0554              |
| Room_1         | 0.7071            | 0.0772              | 0.0625              | 0.0056              | 0.0454              |
| Avg. (Hybrid)  | 0.7360            | 0.0593              | 0.0673              | 0.0055              | 0.0406              |
| Avg. (SS-NeRF) | <b>0.9243</b>     | <b>0.0395</b>       | <b>0.0429</b>       | <b>0.0038</b>       | <b>0.0179</b>       |

Table 2: Performance of the Hybrid model on the Replica dataset. SS-NeRF also outperforms the hybrid baseline for all the tasks, showing that it is non-trivial to synthesize paired color images and other scene properties.

semantic and geometric scene representation is critical for synthesizing different scene properties.

### 2.2. Full Results of Two Different Modeling Strategies

For our SS-NeRF model design, we propose two different decoding strategies for different scene properties:  $\mathbf{F}_{\text{dec}}^v$  which considers the additional view input, and  $\mathbf{F}_{\text{dec}}^{nv}$  which only takes the embedded 3D coordinates. We show the full comparison between the two modeling strategies for the four scene properties excluding the surface normal in Table 3. The conclusion remains the same as the main paper:  $\mathbf{F}_{\text{dec}}^v$  works better for SH, KP, and ED, but achieves a slightly worse performance for SL compared with  $\mathbf{F}_{\text{dec}}^{nv}$ . One likely

\*Equal contribution

| Setting                               | Office_3          |                     |                     |                     | Office_4          |                     |                     |                     | Room_0            |                     |                     |                     | Room_1            |                     |                     |                     |
|---------------------------------------|-------------------|---------------------|---------------------|---------------------|-------------------|---------------------|---------------------|---------------------|-------------------|---------------------|---------------------|---------------------|-------------------|---------------------|---------------------|---------------------|
|                                       | SL ( $\uparrow$ ) | SH ( $\downarrow$ ) | KP ( $\downarrow$ ) | ED ( $\downarrow$ ) | SL ( $\uparrow$ ) | SH ( $\downarrow$ ) | KP ( $\downarrow$ ) | ED ( $\downarrow$ ) | SL ( $\uparrow$ ) | SH ( $\downarrow$ ) | KP ( $\downarrow$ ) | ED ( $\downarrow$ ) | SL ( $\uparrow$ ) | SH ( $\downarrow$ ) | KP ( $\downarrow$ ) | ED ( $\downarrow$ ) |
| $\mathbf{F}_{\text{dec}}^{\text{v}}$  | <b>0.9361</b>     | <b>0.0423</b>       | <b>0.0038</b>       | <b>0.0155</b>       | 0.9072            | <b>0.0503</b>       | <b>0.0035</b>       | <b>0.0150</b>       | 0.9662            | <b>0.0293</b>       | <b>0.0039</b>       | <b>0.0209</b>       | 0.8597            | <b>0.0495</b>       | <b>0.0038</b>       | <b>0.0202</b>       |
| $\mathbf{F}_{\text{dec}}^{\text{nv}}$ | 0.9345            | 0.0602              | <b>0.0038</b>       | 0.0188              | <b>0.9162</b>     | 0.0794              | 0.0038              | 0.0183              | <b>0.9707</b>     | 0.0508              | <b>0.0039</b>       | 0.0249              | <b>0.8757</b>     | 0.1075              | 0.0039              | 0.0225              |

Table 3: Full results of the comparison between two different modelling strategies.  $\mathbf{F}_{\text{dec}}^{\text{v}}$  consistently works better for SH, KP, and ED;  $\mathbf{F}_{\text{dec}}^{\text{nv}}$  is a better choice for SL, indicating that SS-NeRF indeed learns a geometry-aware scene representation.

| Setting | Office_3          |                     |                     |                     |                     | Office_4          |                     |                     |                     |                     | Room_0            |                     |                     |                     |                     | Room_1            |                     |                     |                     |                     |
|---------|-------------------|---------------------|---------------------|---------------------|---------------------|-------------------|---------------------|---------------------|---------------------|---------------------|-------------------|---------------------|---------------------|---------------------|---------------------|-------------------|---------------------|---------------------|---------------------|---------------------|
|         | SL ( $\uparrow$ ) | SN ( $\downarrow$ ) | SH ( $\downarrow$ ) | KP ( $\downarrow$ ) | ED ( $\downarrow$ ) | SL ( $\uparrow$ ) | SN ( $\downarrow$ ) | SH ( $\downarrow$ ) | KP ( $\downarrow$ ) | ED ( $\downarrow$ ) | SL ( $\uparrow$ ) | SN ( $\downarrow$ ) | SH ( $\downarrow$ ) | KP ( $\downarrow$ ) | ED ( $\downarrow$ ) | SL ( $\uparrow$ ) | SN ( $\downarrow$ ) | SH ( $\downarrow$ ) | KP ( $\downarrow$ ) | ED ( $\downarrow$ ) |
| w/ RGB  | <b>0.9345</b>     | <b>0.0355</b>       | <b>0.0423</b>       | <b>0.0038</b>       | <b>0.0155</b>       | <b>0.9162</b>     | <b>0.0383</b>       | <b>0.0503</b>       | <b>0.0035</b>       | <b>0.0150</b>       | <b>0.9707</b>     | 0.0323              | <b>0.0293</b>       | <b>0.0039</b>       | <b>0.0209</b>       | <b>0.8757</b>     | <b>0.0520</b>       | <b>0.0495</b>       | <b>0.0038</b>       | <b>0.0202</b>       |
| w/o RGB | 0.8128            | 0.0430              | 0.0559              | 0.0098              | 0.0504              | 0.5246            | 0.0490              | 0.0638              | 0.0102              | 0.0566              | 0.2112            | <b>0.0220</b>       | 0.0363              | 0.0147              | 0.0722              | 0.5346            | 0.0619              | 0.0644              | 0.0110              | 0.0450              |

Table 4: Full comparison of the model with (w/) or without (w/o) the RGB branch. RGB supervision is crucial for building scene representations so as to benefit the learning of other visual tasks.

reason is that the keypoint, edge, and shading vary from different view directions, but the semantic labels remain the same. Therefore, the view inputs are essential for the three properties but are redundant for the semantic modeling. The experimental results also support that SS-NeRF indeed learns a geometry-aware scene representation.

### 2.3. Full Ablation on Color Branch

In the main paper, we reported the averaged results of SS-NeRF without the RGB branch. We argue that the color property is a fundamental property of the scene, and it can be beneficial to learning the underlying semantic and geometric scene representations and so can facilitate the learning of the other tasks. In this section, we further provide the full results on all the scenes in Table 4 and the visual comparisons in Figure 1.

We have the following observations: (1) In general, including the additional RGB color branch can benefit the learning of the target scene property, especially for SL, ED, and KP. (2) From Figure 1, when RGB supervision is missing, the model inevitably collapses, ending up predicting an all-zero map. After checking the ground-truth and full model predictions, we hypothesize that the underlying reason might be that the annotations of keypoint and edge are sparse and low-valued so that without other additional objective, it is hard for the model to learn the underlying feature representation. (3) For all these results, the color branch is crucial for building a powerful scene representation, so that it can benefit the target scene-property synthesis task.

### 2.4. Results on BlendedMVS

In addition to the Replica dataset, we also evaluate our model on the BlendedMVS dataset [8]. We show the visual comparison between our model and the heuristic and hybrid baselines in Figure 2. Compared with Replica, BlendedMVS is a relatively easier dataset which mainly contains single objects and has smaller view variance. Therefore, the Heuristic baseline works much better in this scenario. From Figure 2, we can find that SS-NeRF achieves a similar performance as the Heuristic baseline, but significantly outperforms the Hybrid baseline, indicating that SS-NeRF has a good generalization capability for different scenarios.

| Setting  | Office_3         | Office_4         | Room_0        | Room_1           |
|----------|------------------|------------------|---------------|------------------|
| SL       | 0.9345           | 0.9162           | <b>0.9707</b> | 0.8757           |
| SL + SN  | 0.9050(-)        | 0.9188(+)        | 0.9692(-)     | <b>0.8910(+)</b> |
| SL + SH  | 0.9406(+)        | <b>0.9594(+)</b> | 0.8872(-)     | 0.7243(-)        |
| SL + KP  | 0.9482(+)        | 0.9122(-)        | 0.9669(-)     | 0.8777(+)        |
| SL + ED  | 0.9265(-)        | 0.9038(-)        | 0.9311(-)     | 0.8675(-)        |
| SL + All | <b>0.9512(+)</b> | 0.9193(+)        | 0.8785(-)     | 0.7450(-)        |

Table 5: Model performance with additional tasks for semantic labels. SL: semantic labels; SN: surface normal; SH: Shading; KP: keypoints; ED: edges; All: all the four additional tasks. (+) indicates performance increasing, and (-) indicates performance drop.

### 2.5. More Visualizations on Replica

We also visualize the synthesized scene properties of two additional scenes on Replica in Figure 3 to demonstrate the robustness and effectiveness of the proposed method.

## 3. Additional Explorations with Multiple Tasks

### 3.1. Multi-task Learning

In the main paper, we took the semantic segmentation task as an example to explore potential task relationships among all the tasks. Quantitative results in Table 3 of the main paper show how other tasks influence the semantic segmentation task. Here we show the full comparison of the remaining four tasks (SN for surface normal, SL for semantic labels, KP for keypoint, and ED for edge). Each time we focus on one task as the target and treat the others as auxiliary tasks. Displayed in a similar way, experimental results focused on semantic labels (SL), surface normal (SN), keypoint (KP), and edge (ED) are shown in Tables 5, 6, 7, and 8, respectively.

From these results, we have some interesting observations on task relationships. For example, (1) some tasks, such as SN, may be *scene-dependent*; introducing additional tasks consistently benefits the target task in some scenes, while hurts in others. (2) Other scene properties have little effect on the performance of KP in all the scenes, indicating a far relationship from KP to other scene properties. (3) For each property, in most cases we can find a better model when

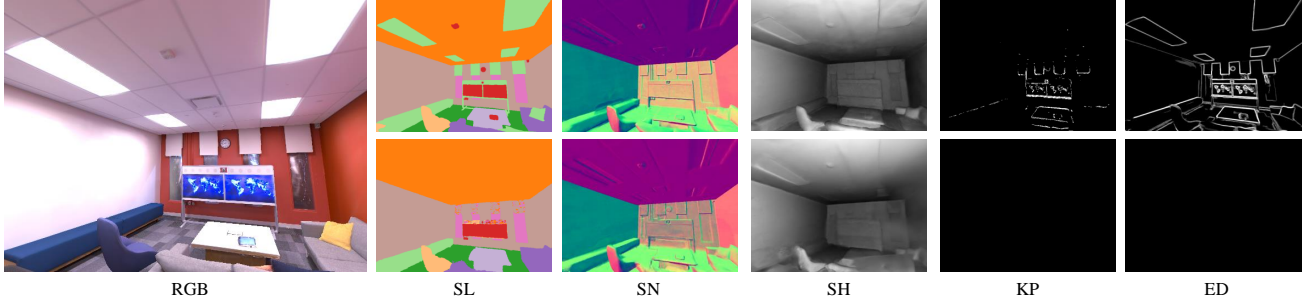

Figure 1: Visualizations of variants of SS-NeRF with or without the RGB branch. **Top row:** SS-NeRF with the RGB branch; **Bottom row:** SS-NeRF without the RGB branch. SS-NeRF degrades and even fails for KP and ED without the RGB branch, indicating that the color information is crucial for building a useful feature representation and benefiting the synthesis of other properties.

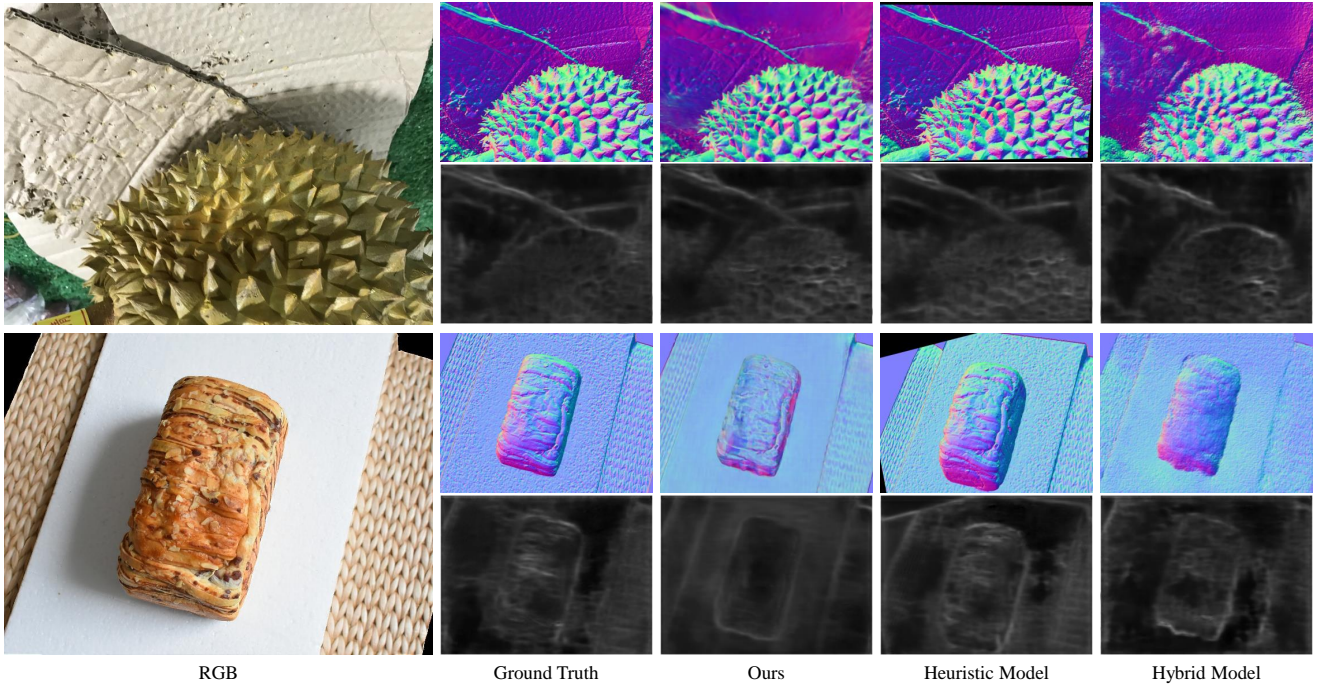

Figure 2: Visual comparison on BlendedMVS. **Top row:** comparison on the surface normal (SN) task; **Bottom row:** comparison on the edge (ED) detection task. Note that for the “Heuristic Model” results, the black/white stripes on the margin of the images mean that we are not able to get information on these regions by projecting from the adjacent frames.

| Setting  | Office_3         | Office_4         | Room_0           | Room_1           |
|----------|------------------|------------------|------------------|------------------|
| SN       | 0.0355           | 0.0383           | 0.0323           | 0.0520           |
| SN + SL  | 0.0293(+)        | 0.0293(+)        | <b>0.0188(+)</b> | <b>0.0523(-)</b> |
| SN + SH  | 0.0250(+)        | 0.0351(+)        | 0.0232(+)        | 0.0631(-)        |
| SN + KP  | 0.0247(+)        | <b>0.0257(+)</b> | 0.0231(+)        | 0.0526(-)        |
| SN + ED  | 0.0270(+)        | 0.0315(+)        | 0.0212(+)        | 0.0534(-)        |
| SN + All | <b>0.0234(+)</b> | 0.0258(+)        | 0.0213(+)        | 0.0586(-)        |

Table 6: Model performance with additional tasks for surface normal. SL: semantic labels; SN: surface normal; SH: Shading; KP: keypoints; ED: edges; All: all the four additional tasks. (+) indicates performance increasing, and (-) indicates performance drop.

| Setting  | Office_3         | Office_4      | Room_0           | Room_1        |
|----------|------------------|---------------|------------------|---------------|
| KP       | 0.0038           | <b>0.0035</b> | 0.0039           | <b>0.0038</b> |
| KP + SL  | 0.0042(-)        | <b>0.0035</b> | <b>0.0037(+)</b> | 0.0039(-)     |
| KP + SN  | <b>0.0036(+)</b> | <b>0.0035</b> | <b>0.0037(+)</b> | 0.0040(-)     |
| KP + SH  | 0.0037(+)        | 0.0036(-)     | <b>0.0037(+)</b> | 0.0041(-)     |
| KP + ED  | 0.0037(+)        | 0.0036(-)     | 0.0039           | 0.0041(-)     |
| KP + All | 0.0037(+)        | 0.0036(-)     | 0.0039           | 0.0041(-)     |

Table 7: Model performance with additional tasks for key-point detection. SL: semantic labels; SN: surface normal; SH: Shading; KP: keypoints; ED: edges; All: all the four additional tasks. (+) indicates performance increasing, and (-) indicates performance drop.

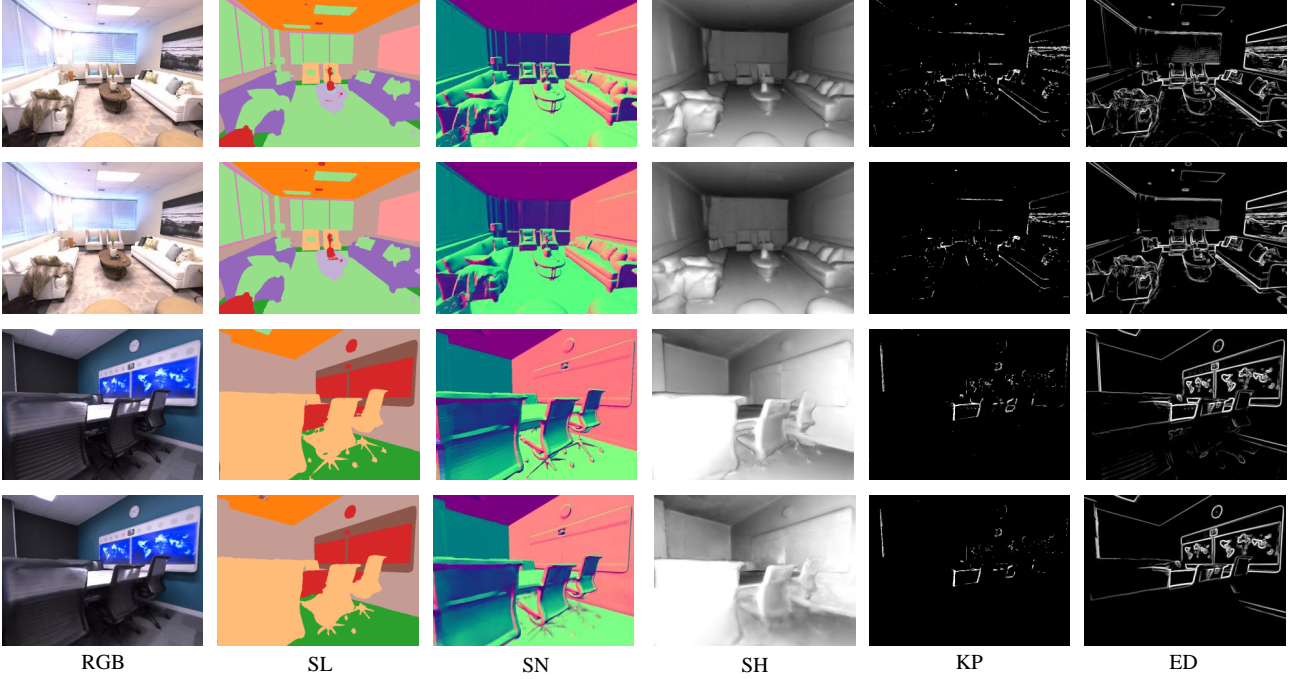

Figure 3: Two additional qualitative results of testing views on Replica. **Top row:** ground-truth; **Bottom row:** our predictions. The predicted image is from the SL task. SS-NeRF is able to generate *realistic and matched* images and other properties.

| Setting  | Office_3          | Office_4          | Room_0            | Room_1        |
|----------|-------------------|-------------------|-------------------|---------------|
| ED       | 0.0155            | 0.0150            | 0.0209            | <b>0.0202</b> |
| ED + SL  | 0.0149(+)         | 0.0163(-)         | 0.0206(+)         | 0.0226(-)     |
| ED + SN  | 0.0181(+)         | 0.0147(+)         | 0.0209            | 0.0214(-)     |
| ED + SH  | 0.0249(-)         | 0.0144(+)         | <b>0.0204</b> (+) | 0.0439(-)     |
| ED + KP  | 0.0157(-)         | <b>0.0140</b> (+) | 0.0207(+)         | 0.0214(-)     |
| ED + All | <b>0.0143</b> (+) | 0.0146(+)         | 0.0205(+)         | 0.0223(-)     |

Table 8: Model performance with additional tasks for edge detection. SL: semantic labels; SN: surface normal; SH: Shading; KP: keypoints; ED: edges; All: all the four additional tasks. (+) indicate performance increasing, (-) indicate performance drop.

introducing additional properties for jointly training, indicating that the SS-NeRF framework can learn shared knowledge across different tasks. More comprehensive conclusions can be drawn when we apply SS-NeRF to more tasks and more scenes, which we leave as interesting future work.

### 3.2. Knowledge Transfer

We also provide the full results of transfer learning for all the scene properties in this section. The data setting remains the same as the main paper for all the scene properties. For each target scene property, we first train our model from another source property, and transfer the knowledge learned by the source to the target through initializing the learned encoding network  $\mathbf{F}_{\text{enc}}$ . We focus on the typical transfer learning setting with limited data (6 training views) for the target property. The results for SL, SN, KP, and ED are

| Settings            | Office_3      | Office_4      | Room_0        | Room_1        |
|---------------------|---------------|---------------|---------------|---------------|
| Limited Views       | 0.7773        | 0.8283        | 0.7370        | 0.5834        |
| SN $\rightarrow$ SL | <b>0.8875</b> | <b>0.9400</b> | <b>0.9318</b> | 0.8267        |
| SH $\rightarrow$ SL | 0.8840        | 0.9207        | 0.8172        | <b>0.8395</b> |
| KP $\rightarrow$ SL | 0.8528        | 0.9271        | 0.7642        | 0.8190        |
| ED $\rightarrow$ SL | 0.8607        | 0.9220        | 0.7865        | 0.8374        |

Table 9: Model performance with transfer learning. With the learned shareable knowledge from other scene properties, the transferred model can consistently have better performance, indicating the good generalization of SS-NeRF.

shown in Tables 9, 10, 11, and 12 respectively.

We have the following observations and conclusions: (1) For all the transfer learning scenarios except one outlier, the transferred models are able to consistently achieve better performance, since they benefit from learned shareable knowledge from other scene properties, indicating the effective generalization of the SS-NeRF framework. (2) Task relationships are easier to find in this difficult transfer learning scenario: SL and SN, KP and ED have closer relationships compared with the other pairs. This conclusion is consistent with human cognition and also the previous work on discriminative multi-task learning [6, 10]. (3) Combined with the results in Table 1 of the main paper,  $\text{SN} \rightarrow \text{SL}$  achieves an even better result on “Office\_4” with fewer labelled data, indicating that the knowledge from one property can be transferred to another through our SS-NeRF framework.

| Settings      | Office_3      | Office_4      | Room_0        | Room_1        |
|---------------|---------------|---------------|---------------|---------------|
| Limited Views | 0.0832        | 0.1028        | 0.0672        | 0.1302        |
| SL → SN       | <b>0.0696</b> | <b>0.0749</b> | <b>0.0493</b> | <b>0.1001</b> |
| SH → SN       | 0.0781        | 0.0853        | 0.0530        | 0.1134        |
| KP → SN       | 0.0730        | 0.0754        | 0.0590        | 0.1075        |
| ED → SN       | 0.0721        | 0.0775        | 0.0563        | 0.1199        |

Table 10: Model performance with transfer learning. With the learned shareable knowledge from other scene properties, the transferred model can consistently have better performance, indicating the good generalization of SS-NeRF.

| Settings      | Office_3      | Office_4      | Room_0        | Room_1        |
|---------------|---------------|---------------|---------------|---------------|
| Limited Views | 0.0061        | <b>0.0063</b> | 0.0051        | 0.0079        |
| SL → KP       | 0.0061        | 0.0075        | 0.0056        | 0.0069        |
| SN → KP       | 0.0082        | 0.0082        | 0.0064        | 0.0073        |
| SH → KP       | 0.0101        | 0.0137        | 0.0084        | 0.0138        |
| ED → KP       | <b>0.0059</b> | 0.0075        | <b>0.0050</b> | <b>0.0065</b> |

Table 11: Model performance with transfer learning. With the learned shareable knowledge from other scene properties, the transferred model can consistently have better performance, indicating the good generalization of SS-NeRF.

| Settings      | Office_3      | Office_4      | Room_0        | Room_1        |
|---------------|---------------|---------------|---------------|---------------|
| Limited Views | 0.0504        | 0.0436        | 0.0368        | 0.0651        |
| SL → ED       | 0.0292        | 0.0358        | 0.0350        | 0.0327        |
| SN → ED       | 0.0298        | 0.0334        | <b>0.0347</b> | <b>0.0300</b> |
| SH → ED       | 0.0332        | 0.0361        | 0.0722        | 0.0450        |
| KP → ED       | <b>0.0271</b> | <b>0.0326</b> | 0.0379        | 0.0311        |

Table 12: Model performance with transfer learning. With the learned shareable knowledge from other scene properties, the transferred model can consistently have better performance, indicating the good generalization of SS-NeRF.

## 4. Additional Implementation Details

### 4.1. Detailed Model Architecture Design

Our model architecture follows NeRF [3] and Semantic-NeRF [11]. Outputs of the tasks modeled by our  $\mathbf{F}_{\text{dec}}^v$  decoder are predicted by a fully-connected layer from the hidden layer and the 2D direction  $(\theta, \phi)$ , which is prior to the original RGB prediction. Likewise, outputs of the tasks modeled by our  $\mathbf{F}_{\text{dec}}^{\text{nv}}$  are predicted by a fully-connected layer from only the hidden layer which is prior to the original volume density prediction. For the modelling of surface normal, since it is independent of the view direction  $(\theta, \phi)$  physically, but dependent on the camera poses which determine the observed value of surface normal, we use  $\mathbf{F}_{\text{dec}}^{\text{nv}}$  to model it but additionally encode the 12-dim pose matrix  $\mathbf{p}$  with the same positional embedding used by NeRF [3]:

$$\gamma(\mathbf{p}) = \left( \sin(2^0 \pi \mathbf{p}), \cos(2^0 \pi \mathbf{p}), \dots, \sin(2^{L-1} \pi \mathbf{p}), \cos(2^{L-1} \pi \mathbf{p}) \right), \quad (1)$$

where  $L$  is set to 10 in our implementation.

### 4.2. Dataset Processing

Both Replica [7] and BlendedMVS [8] have accurate 3D mesh and depth annotations. Replica also has the accurate semantic labels. We render the other ground-truth annotations by ourselves. First, for the surface normal, as mentioned in the main paper, we directly derive them from depth with:

$$SN(x, y, z) = \left( -\frac{dz}{dx}, -\frac{dz}{dy}, 1 \right), \quad (2)$$

where  $(x, y, z)$  are the 3D coordinates and  $\frac{dz}{dx}, \frac{dz}{dy}$  are the gradients of  $x$  and  $y$  with respect to  $z$ , respectively. We generate the edge annotations with a Canny edge detector [2] and the keypoint annotations with the SURF [1] algorithm, following Taskonomy [10]. For shading, we render it with a pre-trained model XTConsistency [9]<sup>1</sup>. Notice that the camera poses released by Semantic-NeRF [11] are designated for their own training; we regenerate the camera poses with COLMAP [4, 5].

### 4.3. Other Implementation Details

For each scene in the Replica dataset, we normalize the maximum scale of the camera parameters to 10m and set near and far sample bounds to 0.1m and 10m, respectively. Also, since the views are captured in the face-forwarding manner, we did not use the normalized device coordinate (ndc) provided by NeRF.

For the transfer learning setting, we first freeze  $\mathbf{F}_{\text{enc}}$  and warm up the decoding network for 50k iterations with a learning rate of  $5 \times 10^{-4}$ . Then we train the whole network jointly with an initial learning rate of  $1 \times 10^{-5}$  for another 150k iterations to get the transferred model.

## References

- [1] Herbert Bay, Tinne Tuytelaars, and Luc Van Gool. Surf: Speeded up robust features. In *ECCV*, 2006. 5
- [2] Lijun Ding and Ardeshir Goshtasby. On the canny edge detector. *Pattern recognition*, 2001. 5
- [3] Ben Mildenhall, Pratul P. Srinivasan, Matthew Tancik, Jonathan T. Barron, Ravi Ramamoorthi, and Ren Ng. Nerf: Representing scenes as neural radiance fields for view synthesis. In *ECCV*, 2020. 5
- [4] Johannes Lutz Schönberger and Jan-Michael Frahm. Structure-from-motion revisited. In *CVPR*, 2016. 5
- [5] Johannes Lutz Schönberger, Enliang Zheng, Marc Pollefeys, and Jan-Michael Frahm. Pixelwise view selection for unstructured multi-view stereo. In *ECCV*, 2016. 5
- [6] Trevor Standley, Amir R Zamir, Dawn Chen, Leonidas Guibas, Jitendra Malik, and Silvio Savarese. Which tasks should be learned together in multi-task learning? In *ICML*, 2020. 4

<sup>1</sup><https://github.com/EPFL-VILAB/XTConsistency/>

- [7] Julian Straub, Thomas Whelan, Lingni Ma, Yufan Chen, Erik Wijmans, Simon Green, Jakob J Engel, Raul Mur-Artal, Carl Ren, Shobhit Verma, et al. The Replica dataset: A digital replica of indoor spaces. *arXiv preprint arXiv:1906.05797*, 2019. 1, 5
- [8] Yao Yao, Zixin Luo, Shiwei Li, Jingyang Zhang, Yufan Ren, Lei Zhou, Tian Fang, and Long Quan. Blendedmvs: A large-scale dataset for generalized multi-view stereo networks. *CVPR*, 2020. 2, 5
- [9] Amir R Zamir, Alexander Sax, Nikhil Cheerla, Rohan Suri, Zhangjie Cao, Jitendra Malik, and Leonidas J Guibas. Robust learning through cross-task consistency. In *CVPR*, 2020. 5
- [10] Amir R Zamir, Alexander Sax, William Shen, Leonidas J Guibas, Jitendra Malik, and Silvio Savarese. Taskonomy: Disentangling task transfer learning. In *CVPR*, 2018. 4, 5
- [11] Shuaifeng Zhi, Tristan Laidlow, Stefan Leutenegger, and Andrew J Davison. In-place scene labelling and understanding with implicit scene representation. In *ICCV*, 2021. 5
